# Supplementary material for: MOF-derived nitrogen-doped porous carbon nanofibers with interconnected channels for high-stability Li+/Na+ battery anodes
Source: Royal Society of Chemistry journal article supplement (doi:10.1039/d2ra08135k), 2023-01-01
Supplement: d2ra08135k1.pdf [file d2ra08135k1.pdf]

# MOF-derived nitrogen-doped porous carbon nanofibers with interconnected channels for high-stable $\text{Li}^+/\text{Na}^+$ battery anodes

Kainian Chu,<sup>a,b</sup> Mulin Hu,<sup>\*a</sup> Bo Song,<sup>a</sup> Senlin Chen,<sup>a</sup> Junyu Li,<sup>a</sup> Fangcai Zheng,<sup>b</sup> Zhiqiang Li,<sup>b</sup> Rui Li,<sup>a</sup> and Jingya Zhou<sup>a</sup>

<sup>a</sup> Hefei Technology College, Hefei 230011, China

<sup>b</sup> Institutes of Physical Science and Information Technology and Key Laboratory of Structure and Functional Regulation of Hybrid Materials of Ministry of Education, Anhui University, Hefei, 230601, China

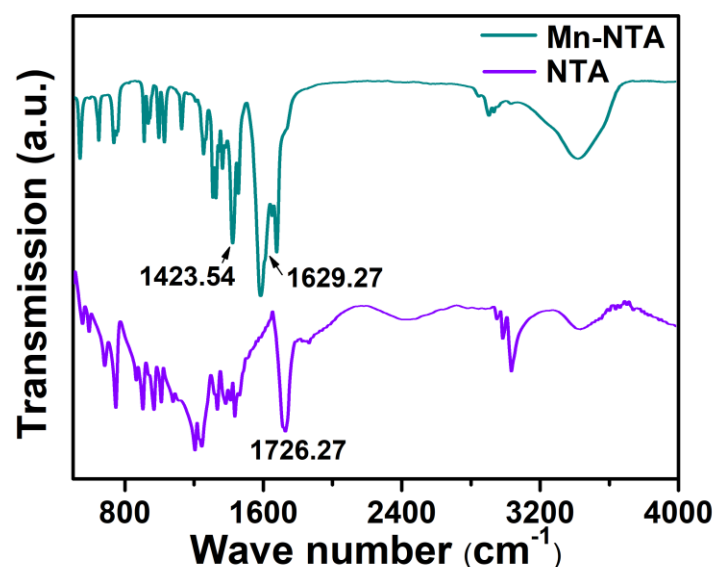

**Fig. S1** The Fourier transform infrared spectroscopy (FTIR) spectrum of Mn-NTA and NTA.

---

\* hml@htc.edu.cn

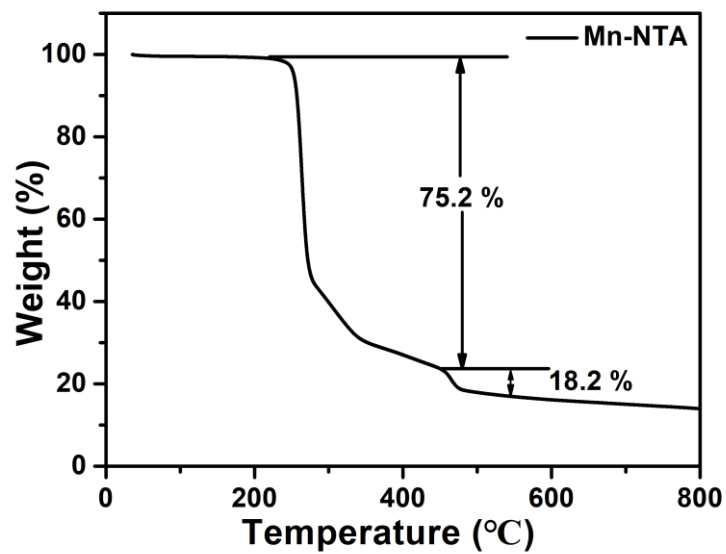

Fig. S2 TGA curve of Mn-NTA nanowires.

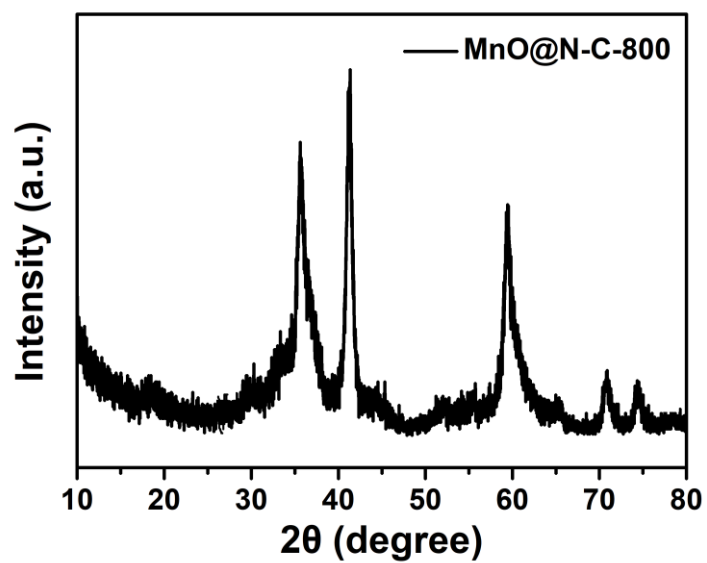

Fig. S3 The XRD pattern of MnO@N-C-800.

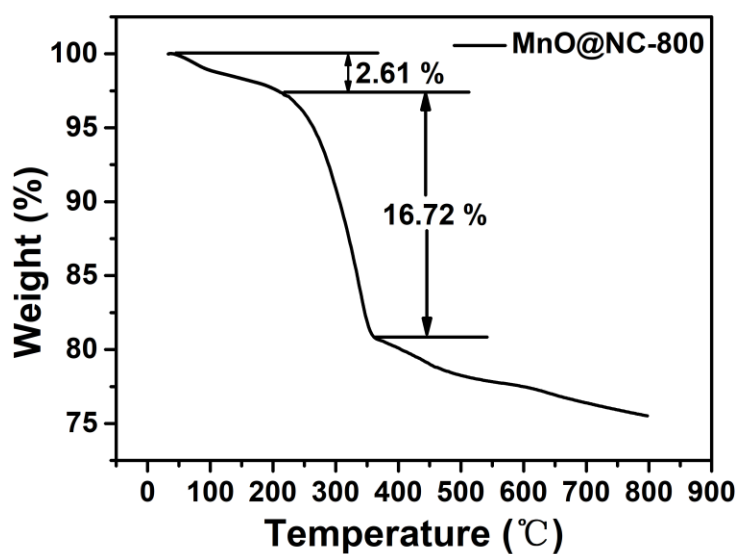

**Fig. S4** The TGA curve of MnO@NC-800 in air.

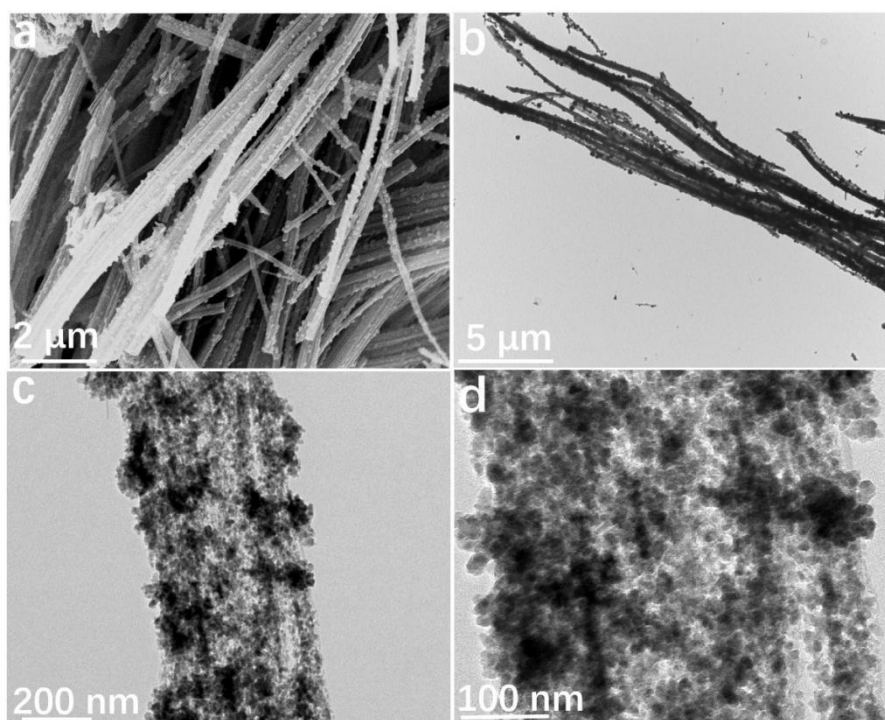

**Fig. S5** (a) SEM and (b,c,d) TEM images of MnO@NC-800.

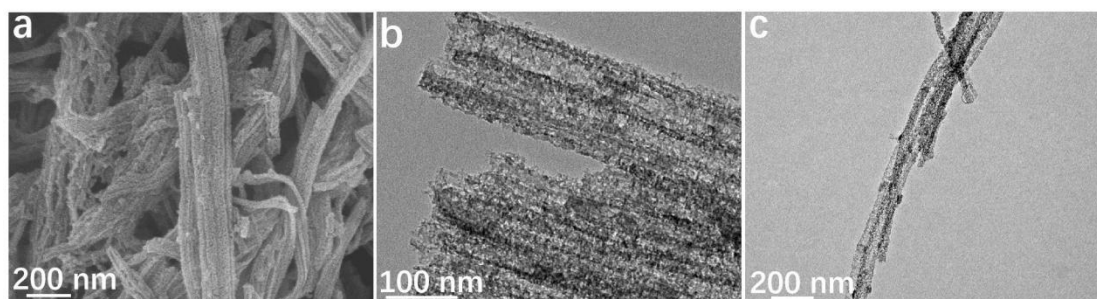

**Fig. S6** (a) SEM and (b,c) TEM images of NCNFs-600.

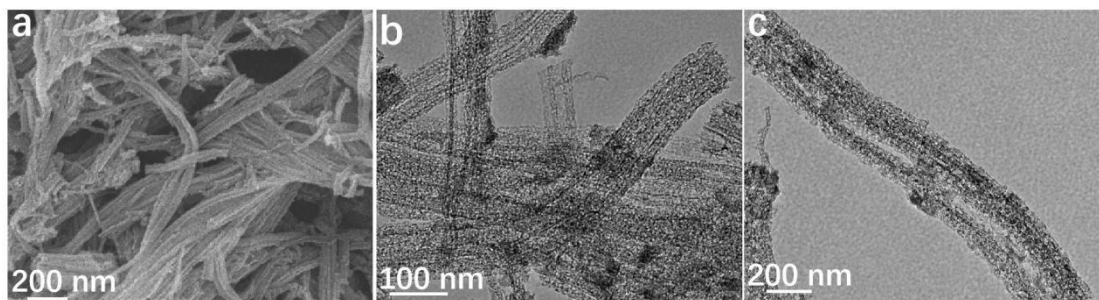

**Fig. S7** (a) SEM and (b,c) TEM images of NCNFs-700.

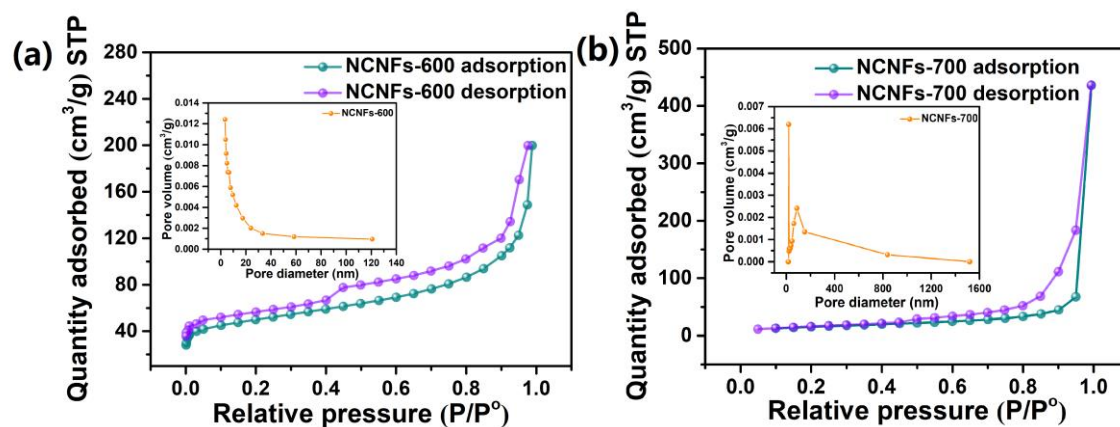

**Fig. S8** Nitrogen adsorption-desorption isotherm curves of NCNFs-600 and NCNFs-700.

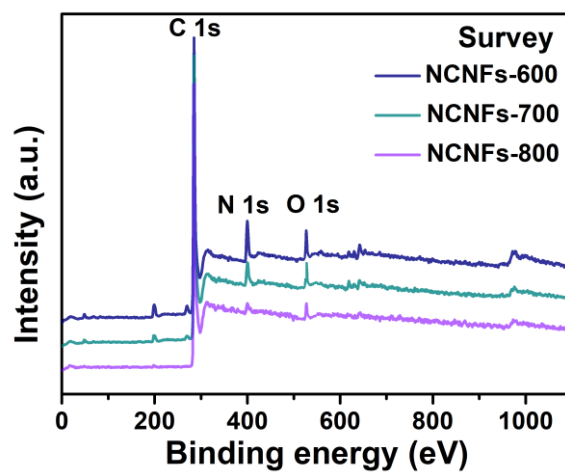

**Fig. S9** The full spectra of NCNFs.

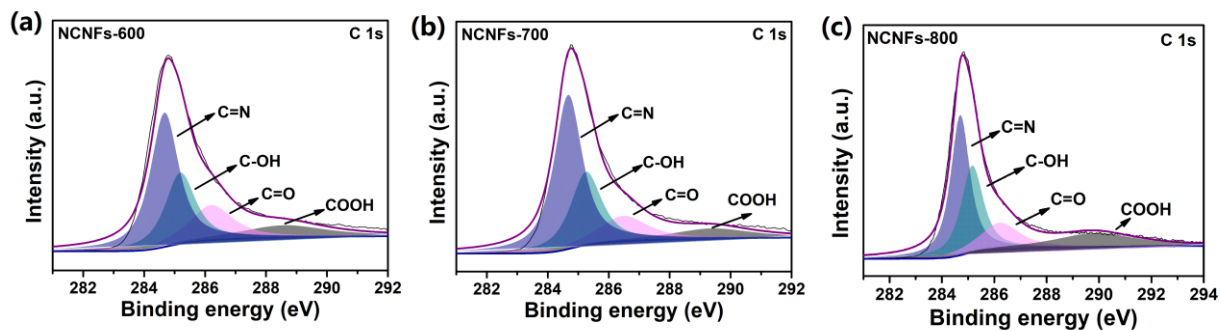

Fig. S10 The C 1s spectra of NCNFs.

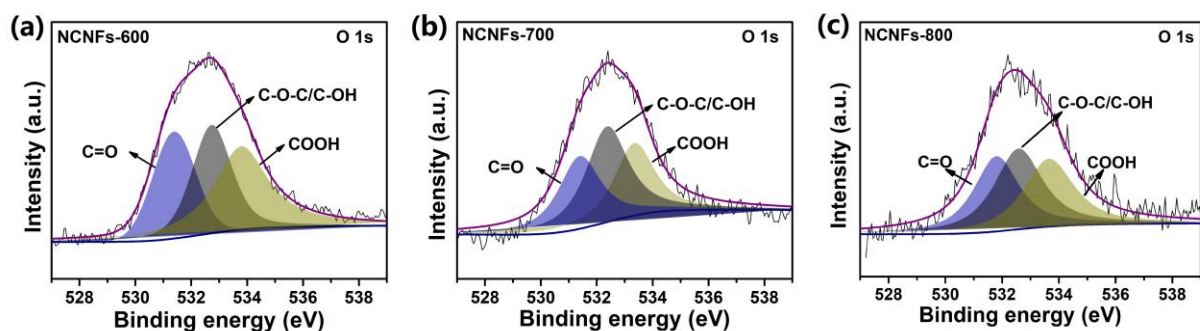

Fig. S11 The O 1s spectra of NCNFs.

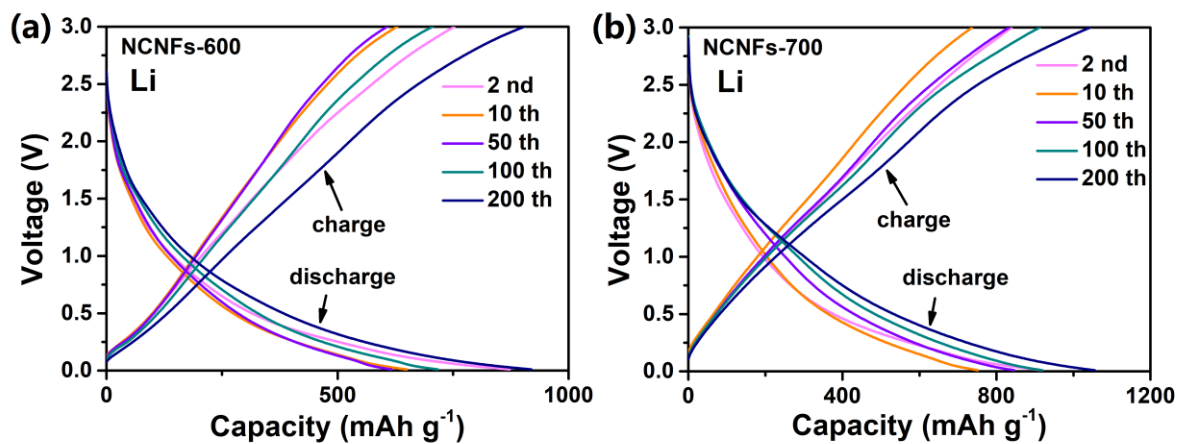

Fig. S12 Discharge/charge profiles of of NCNFs-600 and NCNFs-700 at 0.1 A g<sup>-1</sup> in Li<sup>+</sup> half cells.

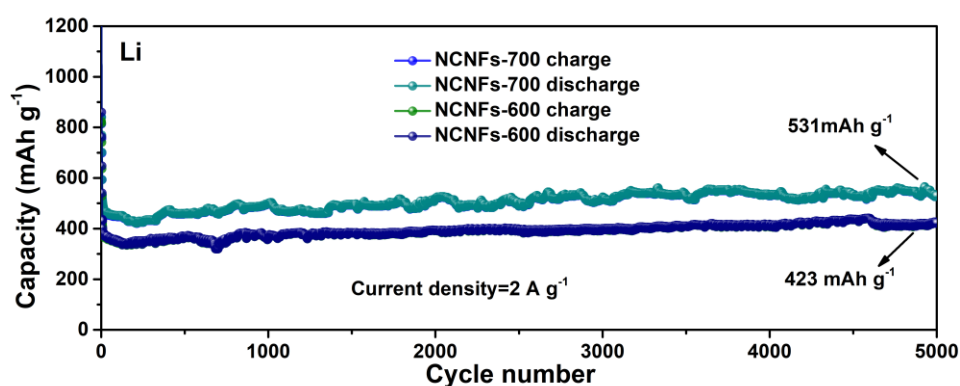

**Fig. S13** The cycling performance of NCNFs-600 and NCNFs-700 at 2 A g<sup>-1</sup> in Li<sup>+</sup> half cells.

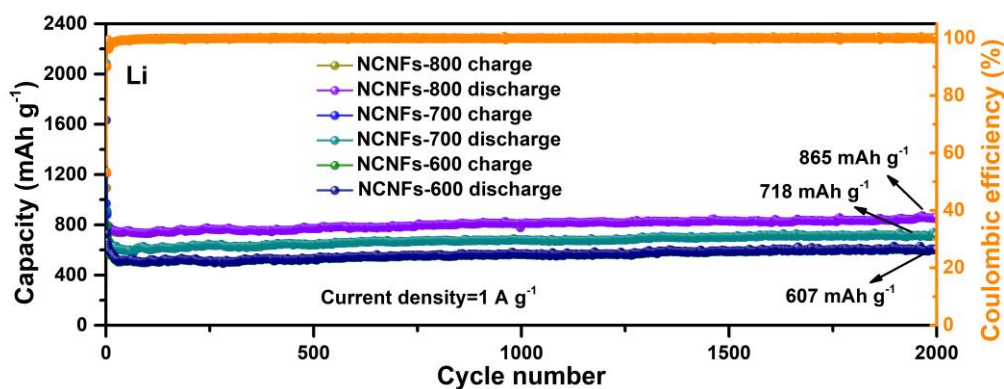

**Fig. S14** The cycling performance of NCNFs at 1 A g<sup>-1</sup> in Li<sup>+</sup> half cells.

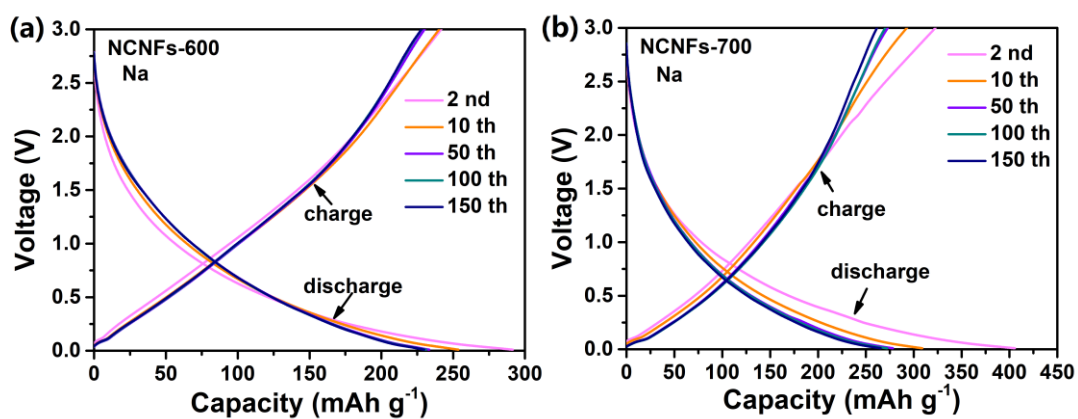

**Fig. S15** Discharge/charge profiles of of NCNFs-600 and NCNFs-700 at 0.1 A g<sup>-1</sup> in Na<sup>+</sup> half cells.

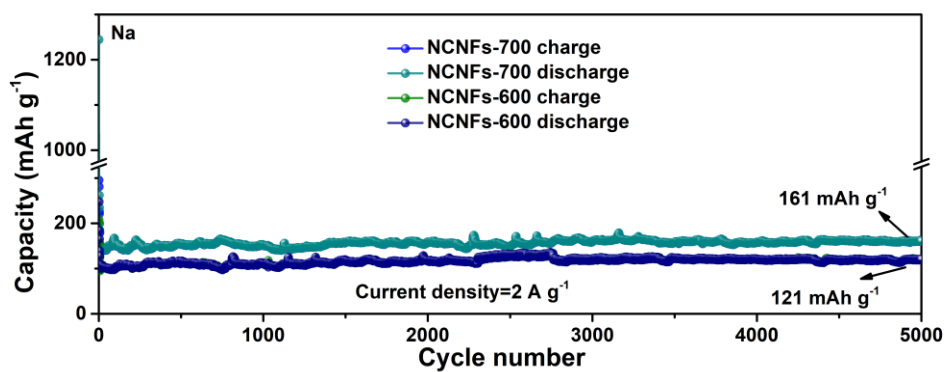

**Fig. S16** The cycling performance of NCNFs-600 and NCNFs-700 at 2 A g<sup>-1</sup> in Na<sup>+</sup> half cells.

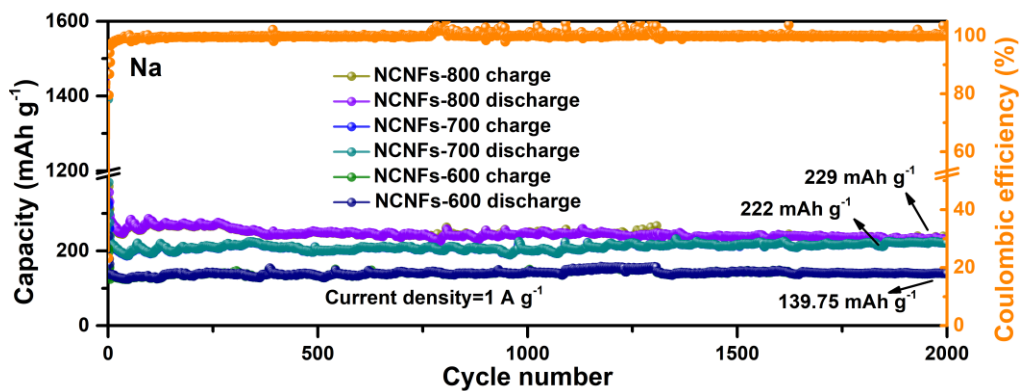

**Fig. S17** The cycling performance of NCNFs at 1 A g<sup>-1</sup> in Na<sup>+</sup> half cells.

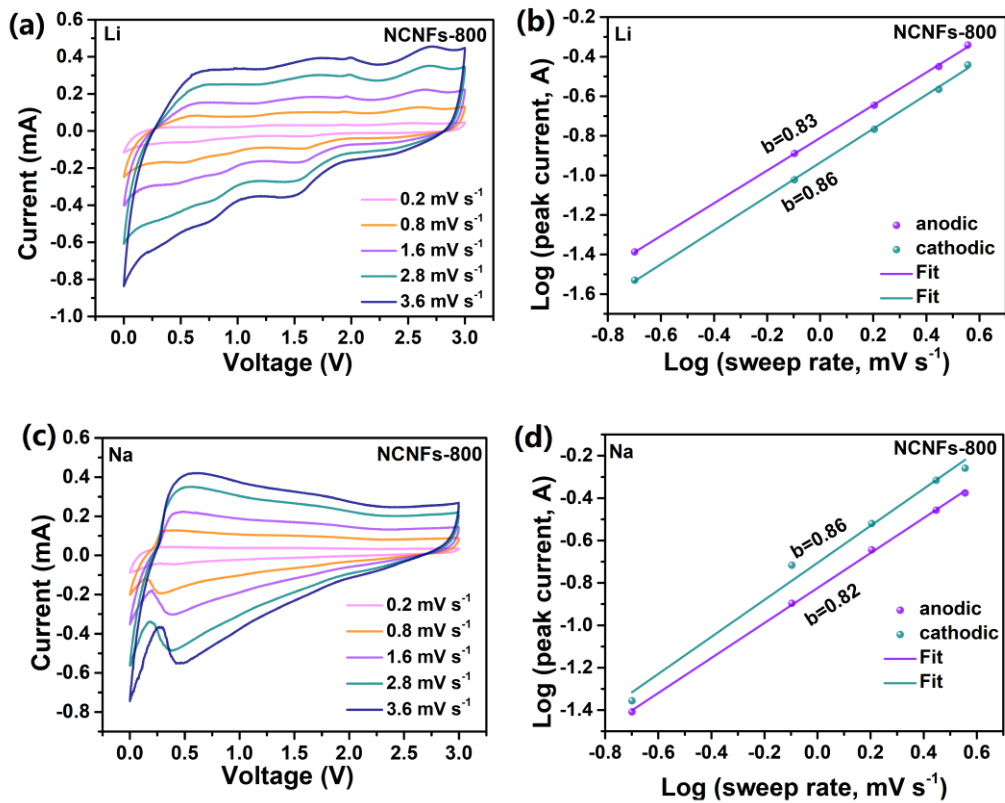

**Fig. S18** (a, c) CV curves of NCNFs-800 at different scan rates of 0.2 to 3.6  $\text{mV s}^{-1}$  in  $\text{Li}^+/\text{Na}^+$  half cells. (b, d) The b values of NCNFs-800 in  $\text{Li}^+/\text{Na}^+$  half cells.

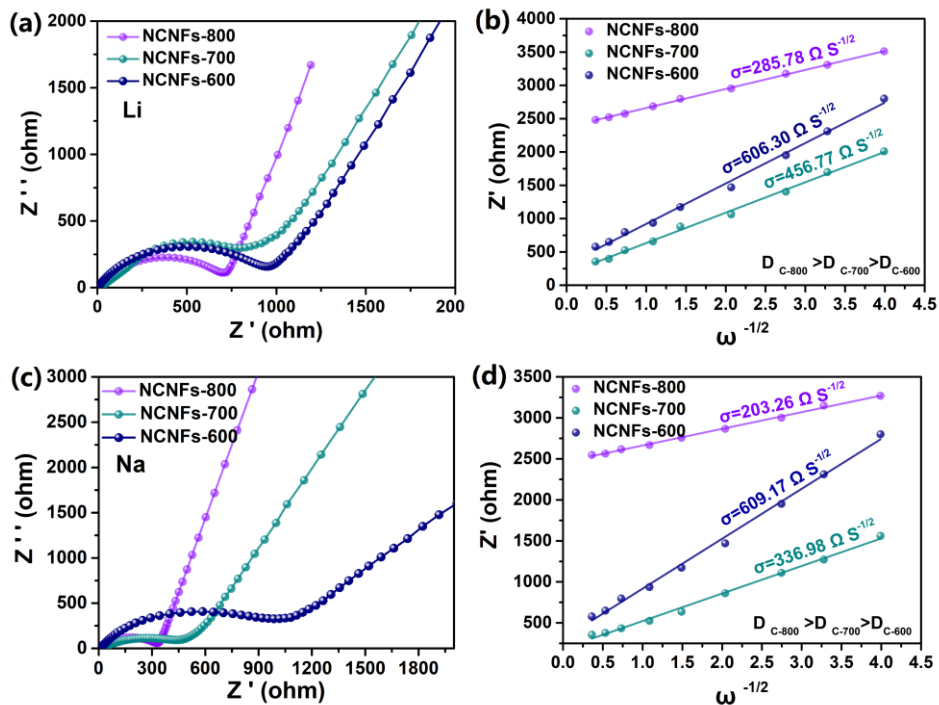

**Fig. S19** (a, c) EIS curves of NCNFs in  $\text{Li}^+/\text{Na}^+$  half cells. (b, d) The linear fits of the  $Z'$  versus  $\omega^{-1/2}$  in the low-frequency region of NCNFs in  $\text{Li}^+/\text{Na}^+$  half cells.



**Table S1** The corresponding elemental contents of NCNFs.

| Sample    | Element content (at%) |       |      | N-6<br>(wt%) | N-5<br>(wt%) | N-Q<br>(wt%) |
|-----------|-----------------------|-------|------|--------------|--------------|--------------|
|           | C                     | N     | O    |              |              |              |
| NCNFs-600 | 81.71                 | 14.05 | 4.21 | 28.47        | 51.80        | 19.73        |
| NCNFs-700 | 87.52                 | 9.85  | 2.63 | 32.67        | 44.26        | 23.07        |
| NCNFs-800 | 93.27                 | 5.31  | 1.42 | 34.09        | 39.68        | 26.23        |

**Table S2.** Comparison of NCNFs-800 with some related carbon anodes for LIBs at low current densities.

| Samples   | Current density<br>(mA g <sup>-1</sup> ) | Cycle<br>number | Capacity<br>(mAh g <sup>-1</sup> ) | Ref.     |
|-----------|------------------------------------------|-----------------|------------------------------------|----------|
| NCNFs-800 | 100                                      | 200             | 1237                               | Our work |
| PTA-700   | 100                                      | 100             | 535                                | 1        |
| WTC-C     | 300                                      | 400             | 350                                | 2        |
| OSPC-1    | 200                                      | 100             | 748                                | 3        |
| PVP-HC    | 400                                      | 200             | 256                                | 4        |
| MES600    | 500                                      | 450             | 144                                | 5        |
| SGHC-1000 | 50                                       | 100             | 366                                | 6        |

**Table S3.** Comparison of NCNFs-800 with some related carbon anodes for SIBs at low current densities.

| Samples     | Current density<br>(mA g <sup>-1</sup> ) | Cycle<br>number | Capacity<br>(mAh g <sup>-1</sup> ) | Ref.     |
|-------------|------------------------------------------|-----------------|------------------------------------|----------|
| NCNFs-800   | 100                                      | 150             | 323                                | Our work |
| PLHC-N-1000 | 25                                       | 100             | 351                                | 7        |
| HC-900      | 50                                       | 200             | 330                                | 8        |
| 3DHPCMs-800 | 100                                      | 100             | 314                                | 9        |
| BC-2H       | 50                                       | 100             | 334                                | 10       |
| SCNs        | 100                                      | 250             | 155                                | 11       |
| NOPCP-600   | 100                                      | 100             | 313                                | 12       |

## References

- 1 G. Huang, Q. Q. Kong, W. T. Yao and Q. Y. Wang, *J. Colloid Interf.*, 2023, **629**, 832-845
- 2 T. Veldevi, S. Raghu, R. Kalaivani and A. Shanmugharaj, *Chemosphere*, 2022, **288**, 132438.
- 3 Z. Q. Zhao, S. Das, G. L. Xing, P. Fayon, P. Heasman, M. Jay, S. Bailey, C. Lambert, H. Yamada, T. Wakihara, A. Trewin, T. Ben, S. L. Qiu and V. Valtchev, *Angew. Chem. Int. edit.*, 2018, **57**, 11952-11956.
- 4 M. J. He, L. Q. Xu, B. Feng, J. B. Hu, S. S. Chang, G. G. Liu, Y. Liu and B. H. Xu, *Molecules*, 2022, **27**, 6994.
- 5 M. X. Song, L. J. Xie, J. Y. Cheng, Z. L. Yi, G. Song, X. Y. Jia, J. P. Chen, Q. G. Guo and C. M. Chen, *J. Energy Chem.*, 2022, **66**, 448-458.
- 6 K. Wang, Y. B. Xu, H. Wu, R. L. Yuan, M. Zong, Y. Li, V. Dravid, W. Ai and J. S. Wu, *Carbon*, 2021, **178**, 443-450.
- 7 W. Nie, H. Cheng, X. Liu, Q. Sun, F. Tian, W. Yao, S. Liang, X. Lu and J. Zhou, *J. Power Sources*, 2022, **522**, 230994.
- 8 J. Wang, Y. S. Li, P. Liu, F. Wang, Q. R. Yao, Y. J. Zou, H. Y. Zhou, M. S. Balogun and J. Q. Deng, *J. Cent. South Univ.*, 2021, **28**, 361-369.
- 9 G. Q. Zou, H. S. Hou, X. Y. Cao, P. Ge, G. G. Zhao, D. L. Yin, X. B. Ji, *J. Mater. Chem. A.*, 2017, **545**, 23550-23558.
- 10 Z. F. Sun, Y. X. Chen, B. J. Xi, C. Geng, W. J. Guo, Q. C. Zhuang, X. G. An, J. Liu, Z. C. Ju and S. L. Xiong, *Energy Storage Mater.*, 2022, **53**, 482-491.
- 11 M. Sun, Y. Qu, F. Zeng, Y. Yang, K. Xu, C. Yuan and Z. H. Lu, *Ind. Eng. Chem. Res.*, 2022, **61**, 2126-2135.
- 12 Z. Q. Li, L. Cai, K. N. Chu, S. K. Xu, G. Yao, L. Z. Wei and F. C. Zheng, *Dalton Trans.*, 2021, **50**, 4335.
